# Supplementary material
Source: PubMed Central journal article supplement (PMC8142124)
Supplement: sj-pdf-1-jcb-10.1177_0271678X20954015.pdf [file sj-pdf-1-jcb-10.1177_0271678X20954015.pdf]

**A** 9 month Old r-Sham and age-matched EFAD Control CVR ABG Values

|                        | Baseline               |                      | End                    |                      |
|------------------------|------------------------|----------------------|------------------------|----------------------|
|                        | r-sham ( <i>n</i> = 5) | EFAD ( <i>n</i> = 3) | r-sham ( <i>n</i> = 5) | EFAD ( <i>n</i> = 3) |
| Temperature °C         | 37                     | 37                   | 37                     | 37                   |
| pH                     | 7.43 ± 0.01            | 7.39 ± 0.01          | 7.42 ± 0.01            | 7.38 ± 0.01          |
| pCO <sub>2</sub> mmHg  | 36.96 ± 0.83           | 34.1 ± 1.4           | 37.22 ± 1.41           | 35.6 ± 1.65          |
| pO <sub>2</sub> mmHg   | 77.6 ± 3.09            | 86.66 ± 2.66         | 77.60 ± 4.88           | 83 ± 3.05            |
| BEecf mol/L            | 0.40 ± 0.24            | -4 ± 0*              | -0.20 ± 0.37           | -4 ± 0.57*           |
| HCO <sub>3</sub> mol/L | 24.78 ± 0.23           | 20.86 ± 0.29*        | 24.18 ± 0.35           | 21.26 ± 0.52*        |
| TCO <sub>2</sub> mol/L | 26.0 ± 0.31            | 21.66 ± 0.33*        | 25.20 ± 0.37           | 22.33 ± 0.33*        |
| sO <sub>2</sub> mol/L  | 95.6 ± 0.50            | 96.66 ± 0.33         | 95.20 ± 0.8            | 96 ± 0               |
| Na mol/L               | 143.8 ± 0.48           | 146 ± 0*             | 144.8 ± 0.58           | 146.66 ± 0.33*       |
| K mol/L                | 5.70 ± 0.16            | 5.16 ± 0.08*         | 5.56 ± 0.2             | 5.33 ± 0.03          |
| iCa mol/L              | 1.20 ± 0.01            | 1.28 ± 0.01*         | 1.22 ± 0.02            | 1.25 ± 0.03          |
| Glu mg/dL              | 265.0 ± 8.24           | 244.66 ± 15.76       | 246.80 ± 10.98         | 239 ± 18.23          |
| Hct %PVC               | 40.40 ± 0.74           | 37.33 ± 0.88*        | 38.20 ± 1.06           | 36.33 ± 1.2          |
| Hb g/dL                | 13.74 ± 0.26           | 12.7 ± 0.32*         | 12.98 ± 0.35           | 12.36 ± 0.39         |

**B** 3 Months post injury r-Sham and r-mTBI CVR ABG Values

|                        | Baseline               |                        | End                    |                        |
|------------------------|------------------------|------------------------|------------------------|------------------------|
|                        | r-sham ( <i>n</i> = 5) | r-mTBI ( <i>n</i> = 5) | r-sham ( <i>n</i> = 5) | r-mTBI ( <i>n</i> = 4) |
| Temperature °C         | 37                     | 37                     | 37                     | 37                     |
| pH                     | 7.43 ± 0.01            | 7.39 ± 0.01            | 7.42 ± 0.01            | 7.41 ± 0.01            |
| pCO <sub>2</sub> mmHg  | 36.96 ± 0.83           | 37.04 ± 1.30           | 37.22 ± 1.41           | 36.25 ± 2.41           |
| pO <sub>2</sub> mmHg   | 77.6 ± 3.09            | 93.0 ± 6.25            | 77.60 ± 4.88           | 77.75 ± 8.79           |
| BEecf mol/L            | 0.40 ± 0.24            | -2.0 ± 1.48            | -0.20 ± 0.37           | -1.25 ± 1.25           |
| HCO <sub>3</sub> mol/L | 24.78 ± 0.23           | 22.88 ± 1.34           | 24.18 ± 0.35           | 23.07 ± 1.26           |
| TCO <sub>2</sub> mol/L | 26.0 ± 0.31            | 24.0 ± 1.48            | 25.20 ± 0.37           | 24.25 ± 1.43           |
| sO <sub>2</sub> mol/L  | 95.6 ± 0.50            | 97.0 ± 0.44            | 95.20 ± 0.8            | 94.5 ± 1.84            |
| Na mol/L               | 143.8 ± 0.48           | 145.60 ± 0.40*         | 144.8 ± 0.58           | 146.5 ± 0.64           |
| K mol/L                | 5.70 ± 0.16            | 5.48 ± 0.24            | 5.56 ± 0.2             | 5.17 ± 0.25            |
| iCa mol/L              | 1.20 ± 0.01            | 1.20 ± 0.02            | 1.22 ± 0.02            | 1.19 ± 0.03            |
| Glu mg/dL              | 265.0 ± 8.24           | 167.40 ± 20.73*        | 246.80 ± 10.98         | 166.75 ± 26.76*        |
| Hct %PVC               | 40.40 ± 0.74           | 39.40 ± 1.43           | 38.20 ± 1.06           | 37.50 ± 0.95           |
| Hb g/dL                | 13.74 ± 0.26           | 13.36 ± 0.49           | 12.98 ± 0.35           | 12.72 ± 0.33           |

**C** 9 months post-injury r-Sham and r-mTBI CVR ABG Values

|                        | Baseline               |                        | End                    |                        |
|------------------------|------------------------|------------------------|------------------------|------------------------|
|                        | r-sham ( <i>n</i> = 5) | r-mTBI ( <i>n</i> = 6) | r-sham ( <i>n</i> = 4) | r-mTBI ( <i>n</i> = 5) |
| Temperature °C         | 37                     | 37                     | 37                     | 37                     |
| pH                     | 7.37 ± 0               | 7.40 ± 0.01            | 7.41 ± 0.02            | 7.40 ± 0.01            |
| pCO <sub>2</sub> mmHg  | 40.32 ± 1.03           | 39.23 ± 1.57           | 34.25 ± 0.99*          | 36 ± 1.94              |
| pO <sub>2</sub> mmHg   | 91.20 ± 3.44           | 91 ± 3.48              | 80.75 ± 4.26           | 81 ± 8.65              |
| BEecf mol/L            | -1.60 ± 0.40           | -0.33 ± 0.49           | -2.50 ± 1.04           | -1.80 ± 1.49           |
| HCO <sub>3</sub> mol/L | 23.64 ± 0.35           | 24.48 ± 0.42           | 22.02 ± 0.69           | 22.86 ± 1.39           |
| TCO <sub>2</sub> mol/L | 24.60 ± 0.40           | 25.66 ± 0.55           | 23.00 ± 0.91           | 24 ± 1.44              |
| sO <sub>2</sub> mol/L  | 96.80 ± 0.37           | 96.83 ± 0.60           | 95.75 ± 0.94           | 94.80 ± 1.77           |
| Na mol/L               | 145.6 ± 0.40           | 146.16 ± 0.40          | 145.0 ± 0.70           | 146.2 ± 1.15           |
| K mol/L                | 5.68 ± 0.26            | 5.68 ± 0.12            | 6.60 ± 0.27            | 5.88 ± 0.16*           |
| iCa mol/L              | 1.28 ± 0               | 1.24 ± 0.01*           | 1.24 ± 0.01*           | 1.20 ± 0.03            |
| Glu mg/dL              | 212.4 ± 13.45          | 228.33 ± 16.87         | 199.25 ± 8.46          | 222.60 ± 37.54         |
| Hct %PVC               | 38.6 ± 1.43            | 39.83 ± 0.79           | 38.25 ± 2.28           | 37.40 ± 1.36           |
| Hb g/dL                | 12.94 ± 0.46           | 13.6 ± 0.24            | 12.97 ± 0.77           | 12.74 ± 0.46           |
