# Supplementary material
Source: PubMed Central journal article supplement (PMC8142124)

### 3 Months Post-Injury

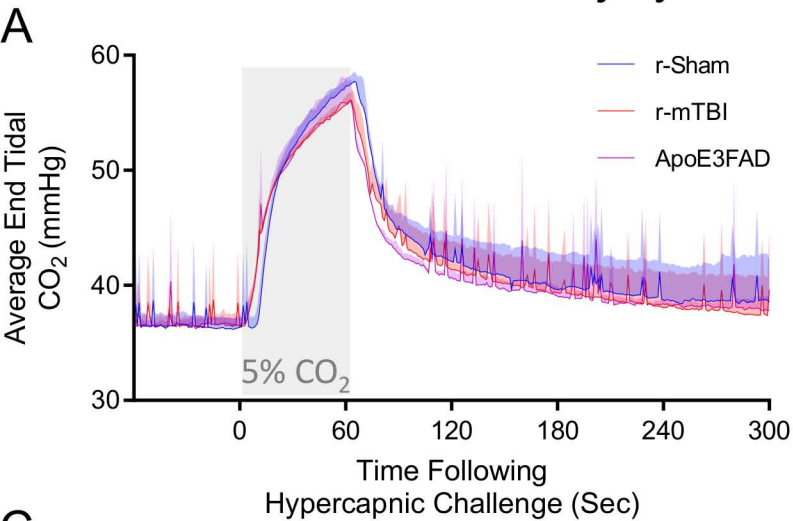

### 9 Months Post-Injury

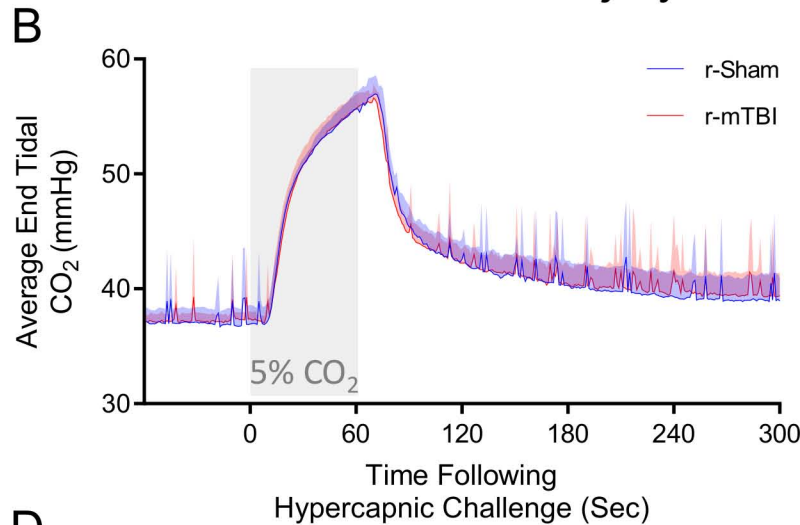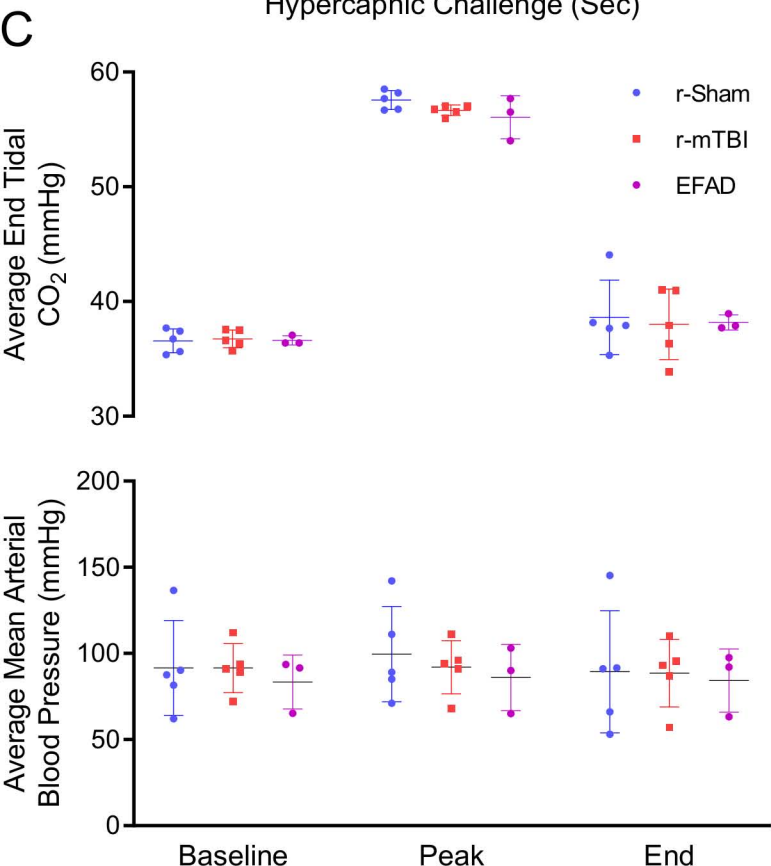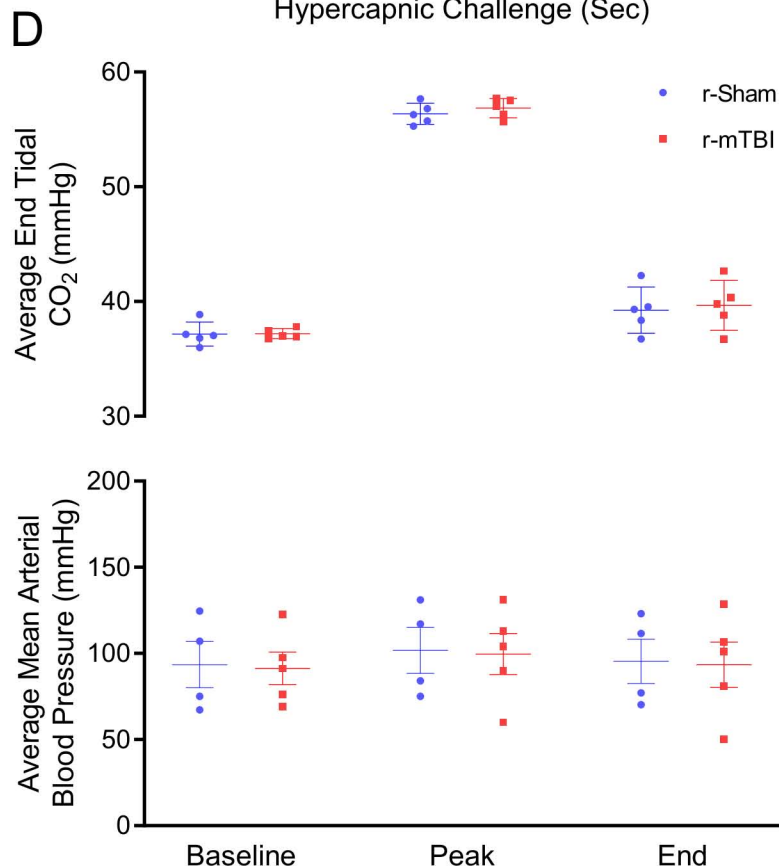

Supplement: sj-pdf-2-jcb-10.1177_0271678X20954015.pdf [file sj-pdf-2-jcb-10.1177_0271678X20954015.pdf]

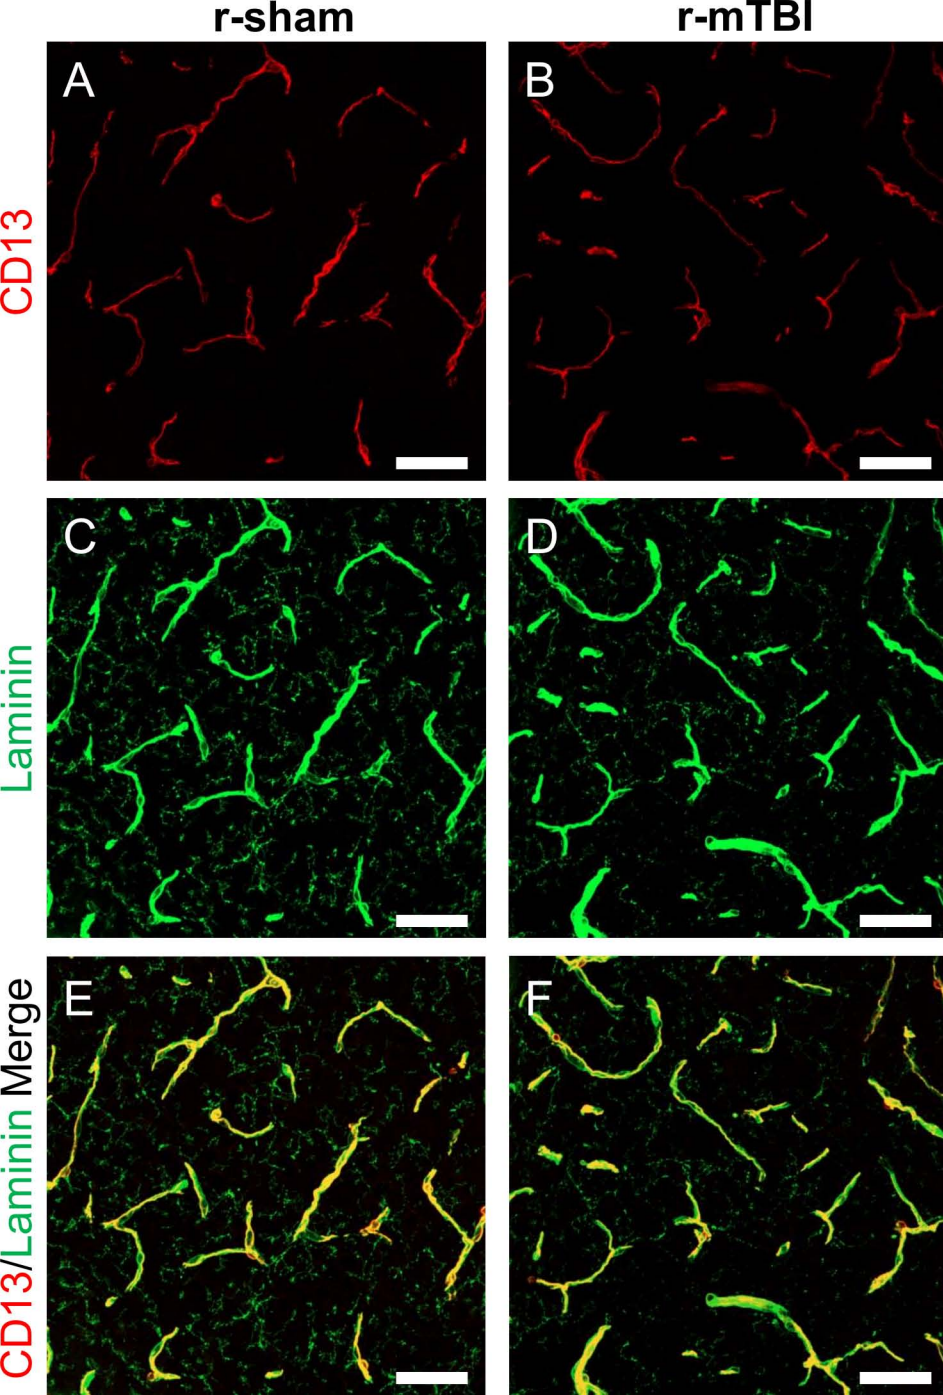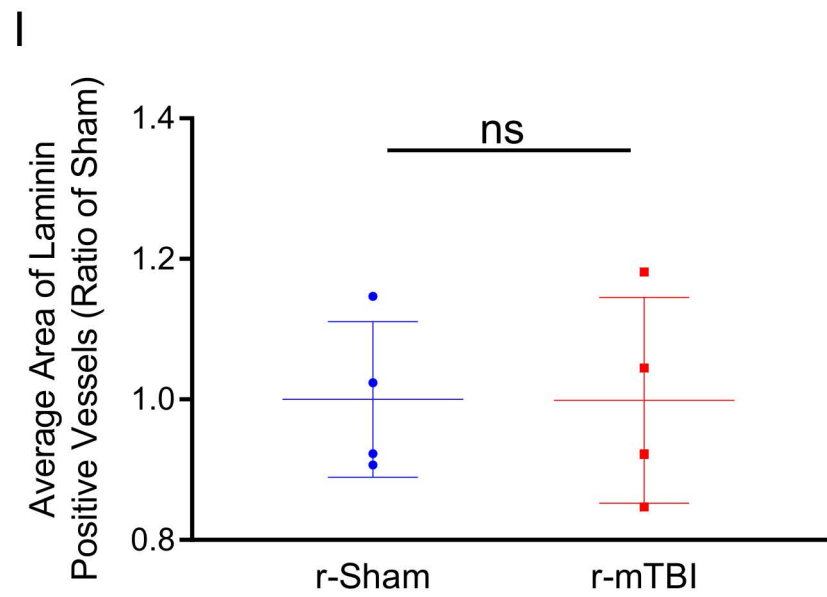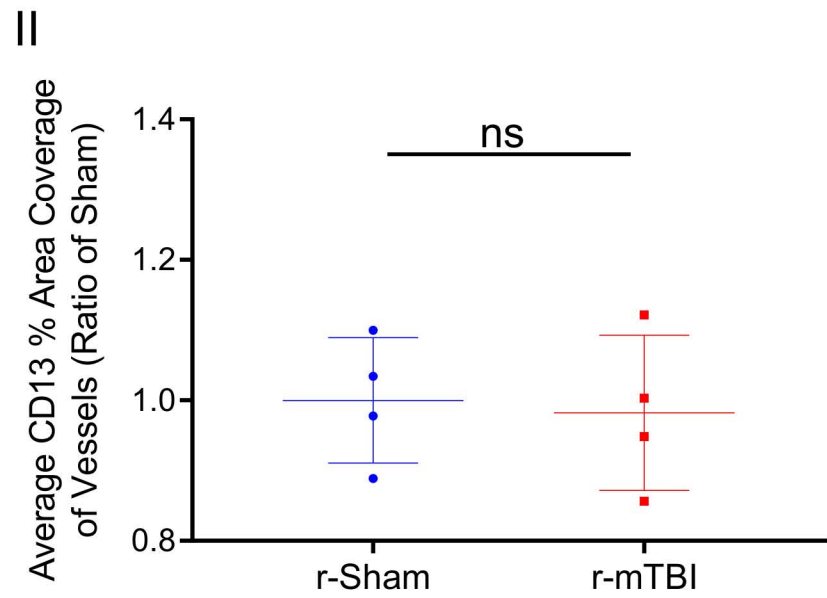

Supplement: sj-pdf-4-jcb-10.1177_0271678X20954015.pdf [file sj-pdf-4-jcb-10.1177_0271678X20954015.pdf]

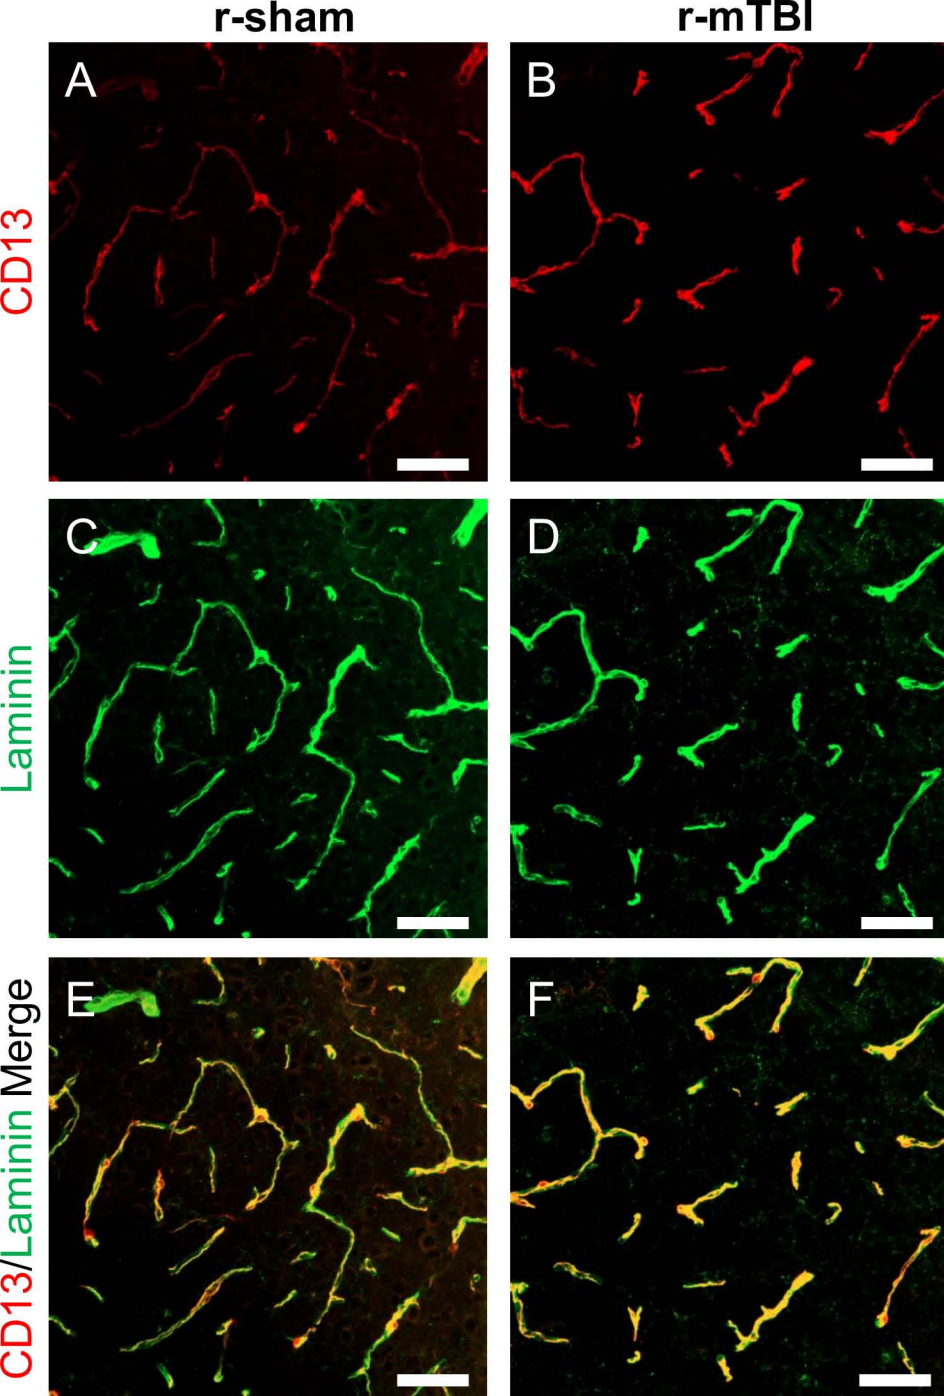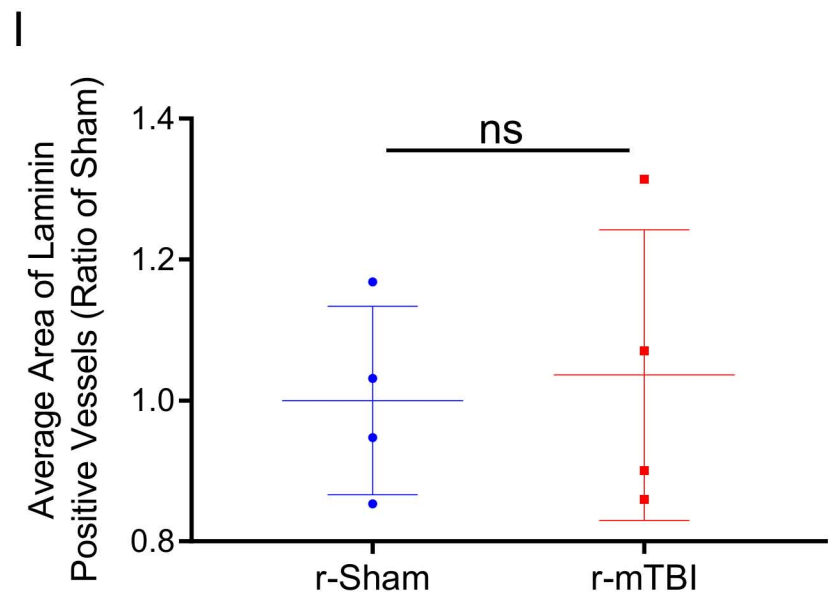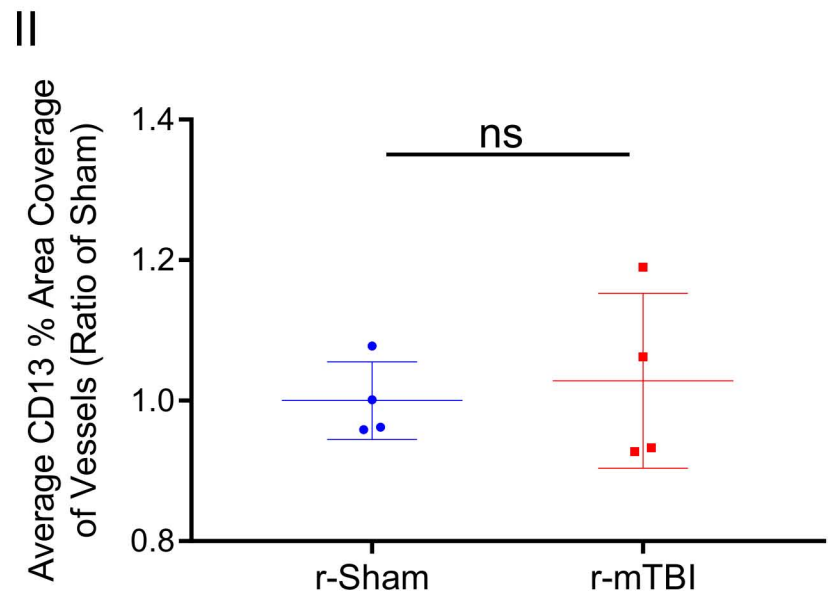

Supplement: sj-pdf-5-jcb-10.1177_0271678X20954015.pdf [file sj-pdf-5-jcb-10.1177_0271678X20954015.pdf]
